# Supplementary material for: Construction and pilot test of a set of indicators to assess the implementation and effectiveness of the who safe childbirth checklist
Source: BMC Pregnancy Childbirth. 2018 May 10;18:154. doi: 10.1186/s12884-018-1797-y (PMC5946578; doi:10.1186/s12884-018-1797-y)
Supplement: Supplementary file 1 — Mexico Safe Childbirth Checklist for mother and newborn (spanish). The original WHO Safe Childbirth Checklist was refined and adapted to the Mexican context. (PDF 5695 kb) [file 12884_2018_1797_MOESM1_ESM.pdf]

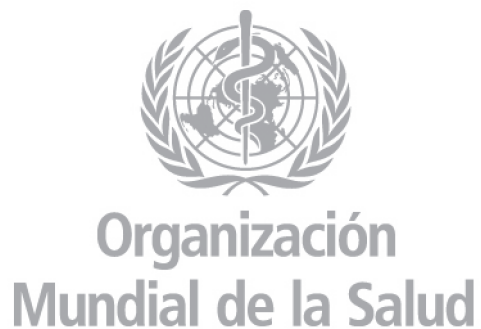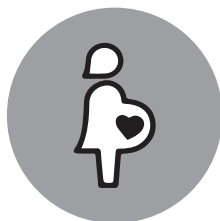

## LISTA DE VERIFICACIÓN DE PARTO SEGURO

Folio \_\_\_\_\_

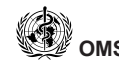

### MADRE

Nº de expediente clínico

Nombre

Edad

Localidad

Escolaridad

Idioma/s

Nº de embarazos

Nº de hijos

### RECIÉN NACIDO

Nombre

Fecha de nacimiento

Edad gestacional al nacimiento

Peso al nacer

Longitud al nacer

Apgar 1

Apgar 5

### HOSPITAL

Nombre

Localidad

Responsable del servicio

Responsable de la SCC

### ETAPA EN LA QUE LLEGA LA MADRE (marcar una opción)

☐ En la admisión/previa al alumbramiento

☐ Justo antes de pujar (o de cesárea)

☐ Justo después de dar a luz (durante la primera hora post-parto)

☐ Antes del egreso/Alta

### MOTIVO DE EGRESO

☐ Referencia

☐ Alta

☐ Muerte

# LISTA DE VERIFICACIÓN DE PARTO SEGURO PARA MÉXICO - EDICION PILOTO

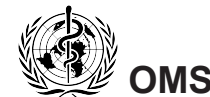

## En la admisión / previo al alumbramiento

## MADRE

**¿Ha llevado la mujer control prenatal?**

- ☐ No, calificar el riesgo  
☐ Si

Revisar

- ☐ Exámenes actualizados de: grupo y Rh, hemograma, VIH, VDRL/RPR, orina, bioquímica y ecografía.

**¿Existe necesidad de referencia de la mujer?**

- ☐ No  
☐ Si

Señalar la causa y habilitar el protocolo:

- ☐ Materna  
☐ Fetal  
☐ Obstétrica

**¿Se ha realizado apertura del partograma en el ingreso?**

- ☐ No  
☐ Si

Vigilar y registrar:

- ☐ Tacto/dilatación según evaluación e indicación médica  
☐ Cada 30 min: frecuencia cardíaca de la mujer y del feto, y las contracciones.  
☐ Cada 2 horas: temperatura.  
☐ Cada 4 horas: presión arterial

**¿Necesita la madre comenzar tratamiento con... ?**

**Antibióticos**

- ☐ No  
☐ Si, administrado

Señalar la causa:

- ☐ Temperatura > 38°  
☐ Flujo con olor desagradable (fétido)  
☐ Ruptura de membranas > 18 horas  
☐ En trabajo de parto > 24 horas  
☐ Otras \_\_\_\_\_

**Antihipertensivo**

- ☐ No  
☐ Si

Nombre del medicamento \_\_\_\_\_

**Sulfato de magnesio**

- ☐ No  
☐ Si, administrado

En este caso señalar la causa:

- ☐ Presión diastólica  $\geq 110$  mm/Hg y 3+ proteinuria  
☐ Presión diastólica  $\geq 90$  mm/Hg, 2 + proteinuria, y cualquiera de : cefalea severa o visión borrosa  
☐ Dolor epigástrico (descartar hematoma hepático no roto)  
☐ Excepción: Insuficiencia renal, lesión miocárdica, bloqueo cardíaco, miastenia gravis.  
☐ Otros \_\_\_\_\_

## En la admisión / previo al alumbramiento

## MADRE

**¿Necesita la madre comenzar tratamiento anti-retroviral?**

- ☐ No  
☐ Si, administrado

Mujer con VIH + y en trabajo de parto.  
Nombre del medicamento \_\_\_\_\_

**Disponibilidad de insumos para el lavado de manos y uso de guantes para cada exploración vaginal:**

- ☐ No  
☐ Si

**Se ofrece, informa y anima al acompañante para estar presente en el parto:**

- ☐ No  
☐ Si

**Confirmar que la mujer y/o el acompañante han sido informados sobre los signos de alarma ante los que pedir ayuda:**

- ☐ No  
☐ Si

Señalar cuales conocen:

- ☐ Sangrado  
☐ Sensación de urgencia de pujar  
☐ Intenso dolor abdominal  
☐ Disminución de movimientos fetales  
☐ Intenso dolor de cabeza  
☐ Alteraciones visuales  
☐ Pérdida de líquido trans-vaginal  
☐ Alteraciones cognitivas

**¿Se permite la ingesta de líquido durante el trabajo de parto?**

- ☐ No  
☐ Si

**¿Se permite posición libre para el parto?**

- ☐ No  
☐ Si

**Completado por:** Nombre \_\_\_\_\_  
Cargo/Puesto \_\_\_\_\_

# LISTA DE VERIFICACIÓN DE PARTO SEGURO PARA MÉXICO - EDICIÓN PILOTO

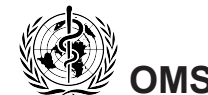

| Justo antes de pujar (o de cesárea)                                                                                                                                                                               |                                                                                                                                                                                                                                                                                                                                                                                                                                                                                                                                                                                                                                                                                                                                                                                    | MADRE |
|-------------------------------------------------------------------------------------------------------------------------------------------------------------------------------------------------------------------|------------------------------------------------------------------------------------------------------------------------------------------------------------------------------------------------------------------------------------------------------------------------------------------------------------------------------------------------------------------------------------------------------------------------------------------------------------------------------------------------------------------------------------------------------------------------------------------------------------------------------------------------------------------------------------------------------------------------------------------------------------------------------------|-------|
| <b>¿Presenta la madre indicación de cesárea?</b><br><input type="checkbox"/> No<br><input type="checkbox"/> Si                                                                                                    | Se realiza segunda opinión y señalar la causa:<br><input type="checkbox"/> 2 cesáreas previas<br><input type="checkbox"/> situación transversa<br><input type="checkbox"/> embarazo gemelar<br><input type="checkbox"/> presentación pélvica<br><input type="checkbox"/> cardiopatía clase III y IV<br><input type="checkbox"/> hidrocefalia fetal<br><input type="checkbox"/> antecedente de cirugía uterina<br><input type="checkbox"/> tumor que obstruya el canal de parto<br><input type="checkbox"/> desprendimiento prematuro de placenta normoinsera<br><input type="checkbox"/> producto óbito mayor de 30 SDG en paciente sin trabajo de parto por más de 24 horas.<br><input type="checkbox"/> placenta previa total<br><input type="checkbox"/> cerclaje vía abdominal |       |
| <b>¿Presenta la madre indicación de parto instrumentado?</b><br><input type="checkbox"/> No<br><input type="checkbox"/> Si                                                                                        | Señalar la causa:<br><input type="checkbox"/> cesárea previa<br><input type="checkbox"/> expulsivo con inestabilidad fetal<br><input type="checkbox"/> cardiopatía materna<br><input type="checkbox"/> agotamiento materno<br><input type="checkbox"/> Otra _____                                                                                                                                                                                                                                                                                                                                                                                                                                                                                                                  |       |
| <b>¿Presenta la madre indicación de episiotomía?</b><br><input type="checkbox"/> No<br><input type="checkbox"/> Si                                                                                                | Causa _____                                                                                                                                                                                                                                                                                                                                                                                                                                                                                                                                                                                                                                                                                                                                                                        |       |
| <b>¿Necesita la madre comenzar tratamiento con...?</b><br><b>Antibióticos</b><br><input type="checkbox"/> No<br><input type="checkbox"/> Si, administrado                                                         | Señalar la causa:<br><input type="checkbox"/> Temperatura > 38°<br><input type="checkbox"/> Ruptura de membrana > 18 horas<br><input type="checkbox"/> Flujo con olor desagradable<br><input type="checkbox"/> En el trabajo de parto > 24 horas<br><input type="checkbox"/> Inicio de cesárea<br><input type="checkbox"/> Otras _____                                                                                                                                                                                                                                                                                                                                                                                                                                             |       |
| <b>Antihipertensivo</b><br><input type="checkbox"/> No<br><input type="checkbox"/> Si                                                                                                                             | Nombre del medicamento _____                                                                                                                                                                                                                                                                                                                                                                                                                                                                                                                                                                                                                                                                                                                                                       |       |
| <b>Sulfato de magnesio</b><br><input type="checkbox"/> No<br><input type="checkbox"/> Si, administrado                                                                                                            | Señalar la causa:<br><input type="checkbox"/> Presión diastólica $\geq 110$ mm/Hg y 3+ proteinuria<br><input type="checkbox"/> Presión diastólica $\geq 90$ mm/Hg, 2+ proteinuria, y cualquiera de: cefalea severa o visión borrosa<br><input type="checkbox"/> Dolor epigástrico (descartar hematoma hepático no roto)<br><input type="checkbox"/> Excepción: Insuficiencia renal, lesión miocárdica, bloqueo cardíaco, miastenia gravis.<br><input type="checkbox"/> Otros _____                                                                                                                                                                                                                                                                                                 |       |
| <b>Disponibilidad de insumos para atención de la madre inmediatamente antes del parto:</b><br><input type="checkbox"/> No<br><input type="checkbox"/> Si                                                          | <input type="checkbox"/> Guantes<br><input type="checkbox"/> Uterotónico: Oxitocina 10 IU en jeringa<br><input type="checkbox"/> Jabón y agua limpia<br><input type="checkbox"/> 2 pinzas de anillos                                                                                                                                                                                                                                                                                                                                                                                                                                                                                                                                                                               |       |
| <b>¿Se ha identificado a un asistente para el parto y está informado de que debe estar listo para prestar ayuda en cualquier momento del parto?</b><br><input type="checkbox"/> No<br><input type="checkbox"/> Si | Nombre _____                                                                                                                                                                                                                                                                                                                                                                                                                                                                                                                                                                                                                                                                                                                                                                       |       |
| <b>Completado por:</b> Nombre _____<br>Cargo/Puesto _____                                                                                                                                                         |                                                                                                                                                                                                                                                                                                                                                                                                                                                                                                                                                                                                                                                                                                                                                                                    |       |

| Justo después de dar a luz (durante la primera hora posterior al parto)                                                                                                             |                                                                                                                                                                                                                                                                                                                                                                                                                                                                                                 | MADRE |
|-------------------------------------------------------------------------------------------------------------------------------------------------------------------------------------|-------------------------------------------------------------------------------------------------------------------------------------------------------------------------------------------------------------------------------------------------------------------------------------------------------------------------------------------------------------------------------------------------------------------------------------------------------------------------------------------------|-------|
| <b>Atención a la madre inmediatamente después del nacimiento:</b><br><input type="checkbox"/> No<br><input type="checkbox"/> Si                                                     | <input type="checkbox"/> Descartar presencia de un segundo producto<br><input type="checkbox"/> Administración de Oxitocina en el primer minuto<br><input type="checkbox"/> Controlar tracción del cordón umbilical para la extracción de la placenta<br><input type="checkbox"/> Masaje de útero después de extraer la placenta                                                                                                                                                                |       |
| <b>¿Está la madre sangrando demasiado?</b><br><input type="checkbox"/> No<br><input type="checkbox"/> Si, pedir ayuda                                                               | Acciones en post parto si hay hemorragia $\geq 500$ mL, o si $\geq 250$ mL y anemia severa:<br><input type="checkbox"/> Masaje al útero<br><input type="checkbox"/> Iniciar vía intravenosa<br><input type="checkbox"/> Considerar uterotónico adicional<br><input type="checkbox"/> Activar equipo de respuesta rápida para emergencias obstétricas<br><input type="checkbox"/> Tratar la causa                                                                                                |       |
| <b>¿Necesita la madre comenzar tratamiento con?</b><br><b>Antibióticos</b><br><input type="checkbox"/> No<br><input type="checkbox"/> Si                                            | Causa _____                                                                                                                                                                                                                                                                                                                                                                                                                                                                                     |       |
| <b>Antihipertensivo</b><br><input type="checkbox"/> No<br><input type="checkbox"/> Si                                                                                               | Nombre del medicamento _____                                                                                                                                                                                                                                                                                                                                                                                                                                                                    |       |
| <b>Sulfato de magnesio</b><br><input type="checkbox"/> No<br><input type="checkbox"/> Si, administrado                                                                              | En este caso señalar la causa:<br><input type="checkbox"/> Presión diastólica $\geq 110$ mm/Hg y 3+ proteinuria<br><input type="checkbox"/> Presión diastólica $\geq 90$ mm/Hg, 2+ proteinuria, y cualquiera de: cefalea severa o visión borrosa<br><input type="checkbox"/> Dolor epigástrico (descartar hematoma hepático no roto)<br><input type="checkbox"/> Excepción: Insuficiencia renal, lesión miocárdica, bloqueo cardíaco, miastenia gravis.<br><input type="checkbox"/> Otros _____ |       |
| <b>Confirmar que la mujer y/o el acompañante han sido informados de los signos de alarma ante los que pedir ayuda</b><br><input type="checkbox"/> No<br><input type="checkbox"/> Si | Señalar cuales conocen:<br><input type="checkbox"/> Sangrado<br><input type="checkbox"/> Fuerte dolor abdominal<br><input type="checkbox"/> Fuerte dolor de cabeza<br><input type="checkbox"/> Alteraciones visuales<br><input type="checkbox"/> Dificultad respiratoria<br><input type="checkbox"/> Dificultad para vaciar la vejiga<br><input type="checkbox"/> Fiebre y/o escalofríos                                                                                                        |       |
| <b>Completado por:</b> Nombre _____<br>Cargo/Puesto _____                                                                                                                           |                                                                                                                                                                                                                                                                                                                                                                                                                                                                                                 |       |

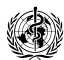

Antes del egreso / Alta

MADRE

¿Está el sangrado de la madre controlado?

- ☐ No: tratar y diferir el alta  
☐ Si

¿Necesita la madre comenzar tratamiento con antibióticos?

- ☐ No  
☐ Si, administrado

Señalar la causa:

- ☐ Temperatura  $>38^{\circ}\text{C}$  y: escalofrío o flujo con olor desagradable o bajo tono/distensión abdominal  
☐ Otras \_\_\_\_\_

¿Se le ha ofrecido a la madre información sobre planificación familiar antes de su egreso?

- ☐ No: dar orientación y consejería  
☐ Si

Confirmar que la mujer y/o el acompañante han sido informados de los signos de alarma ante los que pedir ayuda:

- ☐ No  
☐ Si, administrado

Señalar cuales:

- ☐ Sangrado  
☐ Alteración del estado de conciencia  
☐ Dolor abdominal intenso  
☐ Alteraciones visuales  
☐ Dolor de cabeza intenso  
☐ Dificultad respiratoria  
☐ Dificultad para vaciar la vejiga  
☐ Fiebre y/o escalofríos

Si la madre es VIH + ¿madre y recién nacido tienen antirretrovirales para el tratamiento completo (1 mes el recién nacido y la madre continuación con su seguimiento)?

- ☐ No  
☐ Si, administrado

¿Se ha organizado y acordado el seguimiento de la madre y el RN?

- ☐ No  
☐ Si

Completado por: Nombre \_\_\_\_\_  
Cargo/Puesto \_\_\_\_\_

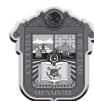

GOBIERNO DEL  
ESTADO DE MÉXICO

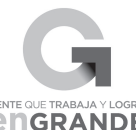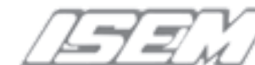

Hospital General de Toluca Dr. Nicolás San Juan  
Hospital General de Ecatepec Dr. José María Rodríguez

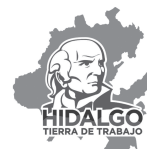

SECRETARÍA DE  
SALUD

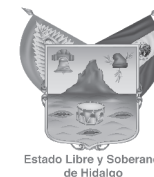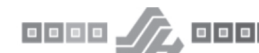

Hospital Obstétrico de Pachuca  
Hospital General de Tula

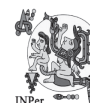

INSTITUTO NACIONAL  
DE PERINATOLOGÍA  
ISIDRO ESPINOSA DE LOS REYES

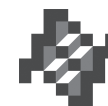

Instituto Nacional  
de Salud Pública

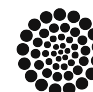

CONACYT  
Consejo Nacional de Ciencia y Tecnología

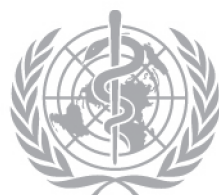

Organización  
Mundial de la Salud

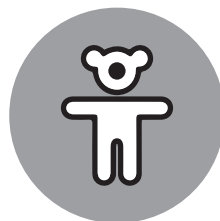

**LISTA DE VERIFICACIÓN  
DE PARTO SEGURO**

# LISTA DE VERIFICACIÓN DE PARTO SEGURO PARA MÉXICO - EDICION PILOTO

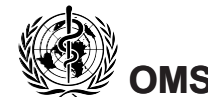

Folio \_\_\_\_\_

## RECIÉN NACIDO

|                                |         |
|--------------------------------|---------|
| Nombre                         |         |
| Edad gestacional al nacimiento |         |
| Peso al nacer                  |         |
| Longitud al nacer              |         |
| Apgar 1                        | Apgar 5 |

## MADRE

|                          |  |
|--------------------------|--|
| Nº de expediente clínico |  |
| Nombre                   |  |

## MOTIVO DE EGRESO

☐ Referencia
 ☐ Alta
 ☐ Muerte

## Justo antes de pujar (o de cesárea)

## RECIÉN NACIDO

Disponibilidad de insumos para atención del recién nacido:

- ☐ No  
☐ Si

- ☐ Toallas limpias
- ☐ Tijera para corte de cordón
- ☐ Perilla de succión
- ☐ Vitamina K
- ☐ Profilaxis oftálmica
- ☐ Equipo de canalización
- ☐ Laringoscopio
- ☐ Cinta/pinza para cordón umbilical
- ☐ Fuente de O<sub>2</sub> y aspiración
- ☐ Adrenalina
- ☐ Cánulas de intubación endotraqueal
- ☐ Solución salina
- ☐ Solución glucosada
- ☐ Mascarilla y bolsa para ventilación (ambú)

¿Está presente algún profesional con capacitación actualizada en reanimación neonatal?

- ☐ No  
☐ Si

Nombre \_\_\_\_\_

Completado por: Nombre \_\_\_\_\_  
 Cargo/Puesto \_\_\_\_\_

# LISTA DE VERIFICACIÓN DE PARTO SEGURO PARA MÉXICO - EDICIÓN PILOTO

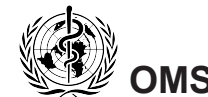

| Justo después de dar a luz<br>(durante la primera hora posterior al parto) | RECIÉN NACIDO                                                                                                                                                                                                                                                                                                                 |
|----------------------------------------------------------------------------|-------------------------------------------------------------------------------------------------------------------------------------------------------------------------------------------------------------------------------------------------------------------------------------------------------------------------------|
| <b>Cuidado del recién nacido:</b>                                          |                                                                                                                                                                                                                                                                                                                               |
| <i>Secar al recién nacido</i>                                              |                                                                                                                                                                                                                                                                                                                               |
| <input type="checkbox"/> No<br><input type="checkbox"/> Si                 |                                                                                                                                                                                                                                                                                                                               |
| <i>Mantenerlo caliente</i>                                                 |                                                                                                                                                                                                                                                                                                                               |
| <input type="checkbox"/> No<br><input type="checkbox"/> Si                 |                                                                                                                                                                                                                                                                                                                               |
| <i>Vitamina K</i>                                                          |                                                                                                                                                                                                                                                                                                                               |
| <input type="checkbox"/> No<br><input type="checkbox"/> Si                 |                                                                                                                                                                                                                                                                                                                               |
| <i>Profilaxis oftálmica.</i>                                               |                                                                                                                                                                                                                                                                                                                               |
| <input type="checkbox"/> No<br><input type="checkbox"/> Si                 |                                                                                                                                                                                                                                                                                                                               |
| <i>Pinzamiento tardío de cordón umbilical</i>                              | Causa _____                                                                                                                                                                                                                                                                                                                   |
| <input type="checkbox"/> No<br><input type="checkbox"/> Si                 |                                                                                                                                                                                                                                                                                                                               |
| <i>¿Se comienza con el contacto piel con piel?</i>                         | Causa _____                                                                                                                                                                                                                                                                                                                   |
| <input type="checkbox"/> No<br><input type="checkbox"/> Si                 |                                                                                                                                                                                                                                                                                                                               |
| <i>¿Se comienza con lactancia materna?</i>                                 | Causa _____                                                                                                                                                                                                                                                                                                                   |
| <input type="checkbox"/> No<br><input type="checkbox"/> Si                 |                                                                                                                                                                                                                                                                                                                               |
| <b>¿Necesita el recién nacido cuidado especial y monitorización?</b>       | Señalar la causa:<br><input type="checkbox"/> Requirió reanimación<br><input type="checkbox"/> Nacimiento más de un mes antes<br><input type="checkbox"/> Hipoglucemia<br><input type="checkbox"/> Necesidad de antibiótico<br><input type="checkbox"/> Dificultad respiratoria<br><input type="checkbox"/> Peso <2500 gramos |
| <input type="checkbox"/> No<br><input type="checkbox"/> Si, administrado   |                                                                                                                                                                                                                                                                                                                               |

| Justo después de dar a luz<br>(durante la primera hora posterior al parto)                                             | RECIÉN NACIDO                                                                                                                                                                                                                                                                                                                                                                                                                                                                                                                                                                          |
|------------------------------------------------------------------------------------------------------------------------|----------------------------------------------------------------------------------------------------------------------------------------------------------------------------------------------------------------------------------------------------------------------------------------------------------------------------------------------------------------------------------------------------------------------------------------------------------------------------------------------------------------------------------------------------------------------------------------|
| <b>¿Existe necesidad de referencia del recién nacido a unidad de cuidados especiales?</b>                              | Señalar la causa:<br><input type="checkbox"/> Sospecha de sepsis<br><input type="checkbox"/> Dificultad respiratoria<br><input type="checkbox"/> Sospecha de patología neonatal (cual): _____                                                                                                                                                                                                                                                                                                                                                                                          |
| <input type="checkbox"/> No<br><input type="checkbox"/> Si, organizado                                                 |                                                                                                                                                                                                                                                                                                                                                                                                                                                                                                                                                                                        |
| <b>¿Necesita el recién nacido comenzar tratamiento con antibióticos?</b>                                               | Señalar la causa:<br><input type="checkbox"/> Respiración rápida (>60 respiraciones/min) o lenta (< 30/min)<br><input type="checkbox"/> Pecho sumido, tiraje intercostal, ruidos, convulsiones<br><input type="checkbox"/> Corioamniotitis<br><input type="checkbox"/> Movilidad escasa o nula a la estimulación<br><input type="checkbox"/> Se le dió a la madre<br><input type="checkbox"/> Ruptura prematura de membranas (>18 horas)<br><input type="checkbox"/> Temperatura muy fría (<35° y no se calienta) o temperatura alta (>38° C)<br><input type="checkbox"/> Otras: _____ |
| <input type="checkbox"/> No<br><input type="checkbox"/> Si, administrado                                               |                                                                                                                                                                                                                                                                                                                                                                                                                                                                                                                                                                                        |
| <b>¿Necesita el recién nacido comenzar tratamiento anti-retroviral?</b>                                                | Administrado en las primeras 6 horas si la madre presenta VIH+.<br>Nombre del medicamento: _____                                                                                                                                                                                                                                                                                                                                                                                                                                                                                       |
| <input type="checkbox"/> No<br><input type="checkbox"/> Si                                                             |                                                                                                                                                                                                                                                                                                                                                                                                                                                                                                                                                                                        |
| <b>Confirmar que la mujer y/o el acompañante han sido informados de los signos de alarma ante los que pedir ayuda:</b> | Señalar cuales conoce:<br><input type="checkbox"/> Ictericia<br><input type="checkbox"/> Fiebre<br><input type="checkbox"/> Crisis convulsivas<br><input type="checkbox"/> Respiración rápida o dificultad al respirar<br><input type="checkbox"/> Extremadamente frío<br><input type="checkbox"/> Interrupción de la correcta alimentación<br><input type="checkbox"/> Menos actividad de lo normal                                                                                                                                                                                   |
| <input type="checkbox"/> No<br><input type="checkbox"/> Si                                                             |                                                                                                                                                                                                                                                                                                                                                                                                                                                                                                                                                                                        |
| <b>Completado por:</b> Nombre _____<br>Cargo/Puesto _____                                                              |                                                                                                                                                                                                                                                                                                                                                                                                                                                                                                                                                                                        |

# LISTA DE VERIFICACIÓN DE PARTO SEGURO PARA MÉXICO - EDICION PILOTO

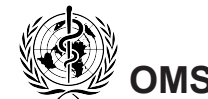

| Antes del egreso / Alta                                                                                                                                                                                                  | RECIÉN NACIDO                                                                                                                                                                                                                                                                                                                                                                                                                                                                                                                                                                                                                                                                   | Observaciones: |
|--------------------------------------------------------------------------------------------------------------------------------------------------------------------------------------------------------------------------|---------------------------------------------------------------------------------------------------------------------------------------------------------------------------------------------------------------------------------------------------------------------------------------------------------------------------------------------------------------------------------------------------------------------------------------------------------------------------------------------------------------------------------------------------------------------------------------------------------------------------------------------------------------------------------|----------------|
| <p><b>¿Necesita el recién nacido comenzar tratamiento con antibióticos?</b></p> <p><input type="checkbox"/> No</p> <p><input type="checkbox"/> Si. Administrar, diferir el alta y dar cuidados especiales o referir:</p> | <p>Señalar la causa:</p> <p><input type="checkbox"/> Se le dio a la madre</p> <p><input type="checkbox"/> Respiración rápida (&gt;60 respiraciones/min) o lenta (&lt;30/min)</p> <p><input type="checkbox"/> Corioamniotitis</p> <p><input type="checkbox"/> Pecho sumido, tiraje intercostal, ruido, convulsiones</p> <p><input type="checkbox"/> Movilidad escasa o nula a la estimulación</p> <p><input type="checkbox"/> Ruptura prematura de membranas (&gt;18 horas)</p> <p><input type="checkbox"/> Temperatura muy fría (&lt;35°C y no se calienta) o temperatura alta (&gt;38°C)</p> <p><input type="checkbox"/> Otras _____</p>                                       |                |
| <p><b>¿Presenta el recién nacido ictericia?</b></p> <p><input type="checkbox"/> No</p> <p><input type="checkbox"/> Si: diferir el alta.</p>                                                                              |                                                                                                                                                                                                                                                                                                                                                                                                                                                                                                                                                                                                                                                                                 |                |
| <p><b>¿Está el recién nacido alimentándose con lactancia materna y correctamente?</b></p> <p><input type="checkbox"/> No: Capacitar y ayudar</p> <p><input type="checkbox"/> Si</p>                                      | <p>Señalar la causa:</p> <p><input type="checkbox"/> VIH</p> <p><input type="checkbox"/> Hepatitis B</p> <p><input type="checkbox"/> CMV</p> <p><input type="checkbox"/> Otra _____</p>                                                                                                                                                                                                                                                                                                                                                                                                                                                                                         |                |
| <p><b>Confirmar que la mujer y/o el acompañante han sido informados de los signos de alarma ante los que pedir ayuda:</b></p> <p><input type="checkbox"/> No: Capacitar y ayudar</p> <p><input type="checkbox"/> Si</p>  | <p>Señalar cuales conocen:</p> <p><input type="checkbox"/> Fiebre</p> <p><input type="checkbox"/> Respiración rápida o dificultad para respirar</p> <p><input type="checkbox"/> Extremadamente frío</p> <p><input type="checkbox"/> No orina o evacua</p> <p><input type="checkbox"/> Cianosis</p> <p><input type="checkbox"/> Interrupción de la correcta alimentación</p> <p><input type="checkbox"/> Crisis convulsivas</p> <p><input type="checkbox"/> Menos actividad de lo normal</p> <p><input type="checkbox"/> Ictericia</p> <p><input type="checkbox"/> Rechazo a vía oral o vómitos</p> <p><input type="checkbox"/> Cordón enrojecido, supurativo o con mal olor</p> |                |
| <p><b>¿Se le ha realizado al recién nacido laboratorio para grupo y Rh?</b></p> <p><input type="checkbox"/> No</p> <p><input type="checkbox"/> Si</p>                                                                    |                                                                                                                                                                                                                                                                                                                                                                                                                                                                                                                                                                                                                                                                                 |                |
| <p><b>Completado por:</b> Nombre _____</p> <p>Cargo/Puesto _____</p>                                                                                                                                                     |                                                                                                                                                                                                                                                                                                                                                                                                                                                                                                                                                                                                                                                                                 |                |

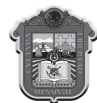

GOBIERNO DEL  
ESTADO DE MÉXICO

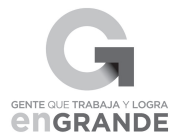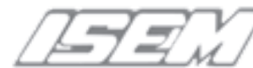

**Hospital General de Toluca Dr. Nicolás San Juan**  
**Hospital General de Ecatepec Dr. José María Rodríguez**

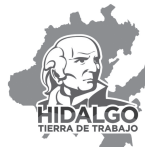

SECRETARÍA DE  
SALUD

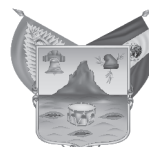

Estado Libre y Soberano  
de Hidalgo

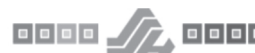

**Hospital Obstétrico de Pachuca**  
**Hospital General de Tula**

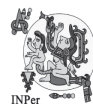

INSTITUTO NACIONAL  
DE PERINATOLOGÍA  
ISIDRO ESPINOSA DE LOS REYES

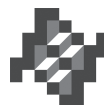

Instituto Nacional  
de Salud Pública

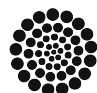

CONACYT  
Consejo Nacional de Ciencia y Tecnología
